# Supplementary material
Source: PubMed Central journal article supplement (PMC1586042)
Supplement: plntphys_pp.106.085472_1.pdf [file plntphys_pp.106.085472_1.pdf]

## SUPPLEMENTAL DATA

**Figure S1.** Leaf discs were infiltrated with 160 mM SNP and cyanide concentration detected immediately after infiltration (0 h) and after 2, 5, 10 and 24 h.

**Figure S2.** Content of JA and JA derivatives determined by GC-MS analysis.

- (A) JA content detected in control unfumigated and O<sub>3</sub>-treated plants harvested at different times (1.5, 2.5, 5, 10 and 24 h) after the start of fumigation. Values represent the averages of four independent experiments ± SE. Inset a shows the JA content detected before the start of fumigation (0 h) and after 20, 40, 60 and 90 min of fumigation. Values represent the averages of four different experiments ± SE.
- (B) OPDA content in control unfumigated and O<sub>3</sub>-treated plants harvested at different times (1.5, 2.5, 5, 10 and 24 h) after the start of fumigation. Values represent the averages of four independent experiments ± SE. Inset b shows the OPDA content detected before the start of fumigation (0 h) and after 20, 40, 60 and 90 min of fumigation. Values represent the averages of four different experiments ± SE.
- (C) JA derivatives content in control unfumigated and O<sub>3</sub>-treated plants harvested before the start of fumigation (0 h) and after 5, 10 and 24 h from the start of ozone fumigation. Values represent the averages of four different experiments ± SE. The data are the mean ± SE from four independent experiments. Bars showing the same letter are not significantly different ( $p \leq 0.01$  as ANOVA test).

**Figure S3.** Effect of SNP and SNP + cPTIO on purified mitochondria. Cyt and AOX capacities are defined as O<sub>2</sub> uptake that was sensitive to 3 mM KCN in the presence of 1 mM SHAM and 1 mM SHAM in the presence of 3 mM KCN, respectively. Respiration rate refers to O<sub>2</sub> uptake in the absence of any addition. Respiratory capacities were

measured after SNP (160  $\mu\text{M}$ ), cPTIO (200  $\mu\text{M}$ ) and SNP (160  $\mu\text{M}$ ) + cPTIO (200  $\mu\text{M}$ ) addition to the reaction vessel. As a control we report the cyt and AOX capacities detected in isolated mitochondria without addition of SNP or cPTIO. The data are the mean  $\pm$  SE from four independent experiments; bars with a different letter are significantly different ( $p \leq 0.01$  as ANOVA test; .cyt capacity, AOX capacity and respiration rate are separated).

**Figure S4.** Endogenous  $\text{H}_2\text{O}_2$  accumulation in leaf discs infiltrated with 5 mM  $\text{H}_2\text{O}_2$ . The measurements were carried out immediately after infiltration (0 h) with  $\text{H}_2\text{O}_2$  and after 1 and 2 h. Leaf tissue (0.5 g FW) was frozen and ground to a powder under liquid nitrogen. The powder was extracted with 1 mL of 0.2 M  $\text{HClO}_4$ , incubated on ice for 5 min, and pelleted by centrifugation at 10,000 g for 10 min at 4°C. The supernatant was neutralized to pH 7.0 with 0.2 M NaOH and briefly centrifuged at 3,000 g for 2 min to sediment the insoluble material. The extracts were passed through 0.8 x 4 cm columns of AG 1X-8 resin (ionic-form chloride; Biorad) and were eluted with distilled water (Rao et al., 2000). The quantification of  $\text{H}_2\text{O}_2$  was carried out with 200  $\mu\text{l}$  of cleared extracts, 300  $\mu\text{l}$  of  $\text{H}_2\text{O}$  and 500  $\mu\text{l}$  of xylenol orange assay reagent. Absorbance of the  $\text{Fe}^{+3}$ -xylenol orange complex was recorded by reading  $A_{560}$  after 45 min. The data are the mean  $\pm$  SE from four independent experiments. Bars showing the same letter are not significantly different ( $p \leq 0.01$  as ANOVA test).
